# Supplementary material for: Annona coriacea Mart. Fractions Promote Cell Cycle Arrest and Inhibit Autophagic Flux in Human Cervical Cancer Cell Lines
Source: PubMed Central journal article supplement (PMC6864525; doi:10.3390/molecules24213963), 2019-11-01
Supplement: molecules-24-03963-s001.pdf [file molecules-24-03963-s001.pdf]

1

2 **Supplementary table 1** - Summary of *Annona coriacea* Mart fractions

3

---

| Name | Fractions                                                      |
|------|----------------------------------------------------------------|
| C1   | Ethanolic extract                                              |
| C2   | Hexane fraction                                                |
| C3   | Ethyl-acetate fraction                                         |
| C4   | Hydroalcoholic fraction                                        |
| C5   | Fraction enriched in acetogenin                                |
| C6   | Neutral dichloromethane fraction obtained acid-base extraction |
| C7   | Dichloromethane fraction enriched in alkaloids                 |

---

**Supplementary table 2-** IC<sub>50</sub> values for the *A. coriacea* fractions in Kinetics assay on cervical cell lines

| Time (Hrs) | IC <sub>50</sub> values of C3 and C5 (Mean ±SD) µg/mL |                         |                       |                        |                       |                        |                       |                     |
|------------|-------------------------------------------------------|-------------------------|-----------------------|------------------------|-----------------------|------------------------|-----------------------|---------------------|
|            | 0                                                     | 3                       | 6                     | 12                     | 16                    | 24                     | 36                    | 72                  |
| Cell line  | C3/C5                                                 | C3/C5                   | C3/C5                 | C3/C5                  | C3/C5                 | C3/C5                  | C3/C5                 | C3/C5               |
| CaSki      | ND                                                    | 19.05 ± 2.9/ 24.4 ± 0.1 | 15.1 ± 0.2/18.7 ± 0.7 | 15.5 ± 1.8/15.5 ± 5.9  | 18.5 ± 3.1/14.0 ± 5.1 | 13.3 ± 2.2/8.9 ± 0.9   | 9.3 ± 0.5/7.06 ± 1.6  | 6.5 ± 1.8/3.6 ± 0.9 |
| HeLa       | ND                                                    | ND                      | 25.0 ± 2.8/23.8 ± 3.5 | 19.0 ± 7.3/18.2 ± 6.2  | 21.8 ± 0.0/17.3 ± 6.9 | 14.3 ± 1.01/12.4 ± 3.3 | 11.6 ± 0.5/8.3 ± 0.8  | 6.6 ± 1.2/4.1 ± 0.4 |
| SiHa       | ND                                                    | 23.7 ± 0.1/19.05 ± 1.0  | 22.9 ± 0.2/18.9 ± 4.7 | 19.2 ± 3.6/ 18.7 ± 1.7 | 21.7 ± 0.6/20.5 ± 3.6 | 14.9 ± 1.3/12.7 ± 4.3  | 11.6 ± 1.8/10.2 ± 2.3 | 8.7 ± 1.3/5.1 ± 0.6 |

ND- Not determined; C1: Ethanolic extract; C2: Hexane fraction; C3: Ethyl acetate fraction; C4: Hydroalcoholic fraction; C5: Fraction enriched in acetogenin; C6: Neutral dichloromethane fraction obtained from acid-base extraction; C7: Dichloromethane fraction enriched in alkaloids

**Supplementary table 3-** Antibodies used in Western Blot analysis

| <b>Antibody</b>                 | <b>Dilution</b> | <b>Condition</b> | <b>Manufacturer / Code</b> |
|---------------------------------|-----------------|------------------|----------------------------|
| Anti - $\beta$ actin            | 1/1000          | 4°C- Overnight   | Cell signaling/ #4967      |
| Anti- PARP (total)              | 1/1000          | 4°C- Overnight   | Cell signaling/ #9542      |
| Anti- Caspase 3 (total)         | 1/1000          | 4°C- Overnight   | Cell signaling/ #9662      |
| Anti-Histon H2A.X (fosforilado) | 1/1000          | 4°C- Overnight   | Cell signaling/ #9718      |
| Anti-Histon H2A.X (total)       | 1/1000          | 4°C- Overnight   | Cell signaling/ #2595      |
| Anti- BAX                       | 1/1000          | 4°C- Overnight   | Cell signaling/ #2772      |
| Anti- Caspase 7 (total)         | 1/1000          | 4°C- Overnight   | Cell signaling/ #9492      |
| Anti- Caspase 7 (clivada)       | 1/1000          | 4°C- Overnight   | Cell signaling/ #9491      |
| Anti- AKT (fosforilado)         | 1/1000          | 4°C- Overnight   | Cell signaling/ #9271      |
| Anti- AKT (total)               | 1/1000          | 4°C- Overnight   | Cell signaling/ #9272      |
| Anti- p44/42 MAPK (fosforilado) | 1/1000          | 4°C- Overnight   | Cell signaling/ #9101      |
| Anti- p44/42 MAPK (total)       | 1/1000          | 4°C- Overnight   | Cell signaling/ #9102      |
| Anti- p27 Kip1                  | 1/1000          | 4°C- Overnight   | Cell signaling/ #2552      |
| Anti- p21 Waf1/Cip1             | 1/1000          | 4°C- Overnight   | Cell signaling/ #2947      |
| Anti- LC3A/B (D3U4C)            | 1/1000          | 4°C- Overnight   | Cell signaling/ #12741     |
| Anti-mouse IgG HPR              | 1/5000          | TA- 1 hour       | Cell signaling/ #7076      |
| Anti-rabbit IgG HPR             | 1/5000          | TA- 1 hour       | Cell signaling/ #7074      |
